# Supplementary material for: Application of microsecond pulsed glow discharge to modern commercially available optical emission spectrometers for bulk elemental analysis
Source: Royal Society of Chemistry journal article supplement (doi:10.1039/c7ja00424a), 2018-01-01
Supplement: c7ja00424a1.pdf [file c7ja00424a1.pdf]

Electronic Supplementary Information for: Application of microsecond Pulsed Glow Discharge for bulk elemental analysis to modern commercially available Optical Emission Spectrometers

**M. Voronov<sup>\*1,2</sup>, V. Hoffmann<sup>1</sup>**

<sup>1</sup> IFW Dresden, Institute for Complex Materials, P.O. Box 270116, D-01171 Dresden, Germany

<sup>2</sup> Kazan National Research Technical University, K. Marx str. 10, 420111, Kazan, Russia

**E-mail: [VoronovMV@mail.ru](mailto:VoronovMV@mail.ru)**

Table S-1. List of PMT channels (namely elements and their wavelengths) used for investigation of background and noises with PMT detection.

| Spectral line (nm) |
|--------------------|
| B I 209.0          |
| Mg I 383.8         |
| Si I 288.2         |
| Ti II 337.3        |
| V I 411.2          |
| Cr I 425.4         |
| Mn I 403.4         |
| Fe II 238.2        |
| Fe I 372.0         |
| Co I 345.4         |
| Ni I 341.5         |
| Zr I 360.1         |
| Nb II 316.3        |
| Mo I 386.4         |
| Sn I 303.4         |
| Sb I 206.8         |
| W I 429.5          |
| Ta I 362.7         |
| Pb II 220.4        |
| Cl I 133.6         |
| Pd I 340.5         |
| Pt I 265.9         |
| Ca II 393.4        |
| Cd I 228.8         |

Table S-2. List of samples used for investigation of spectral lines with CCD detection.

| № | Matrix                                                                                  | Sample         | Additional information                                                                                                                                                                                                                                                    |
|---|-----------------------------------------------------------------------------------------|----------------|---------------------------------------------------------------------------------------------------------------------------------------------------------------------------------------------------------------------------------------------------------------------------|
| 1 | Fe 80.47%, Si 10.06%,<br>Nb 5.95%, B 2.03%,<br>Cu 1.07%                                 | IFW Kal2       | This is a home made calibration sample produced and wet chemically characterized by ICP-OES at IFW Dresden                                                                                                                                                                |
| 2 | Ti 85.5%, Al 5.57%,<br>V 5.57%, Sn 1.99%                                                | IARM 178B      | This CRM was delivered by ARMI (Analytical Reference Materials International Corporation, 700 Corporate Circle, Suite A, Golden Colorado 80401-5636, USA)                                                                                                                 |
| 3 | Cu 82.7%, Zn 7.55%,<br>Si 5.95%, Al 1.9%                                                | MBH WSB1       | This CRM is from MBH Analytical LTD., Holland House, Queens Road, Barnet, EN5 4DJ, England.<br>Cu is not certified in this sample, but was measured by 4 laboratories by FAAS, ICP, volumetric (thiosulfate) and electrogravimetric with a standard deviation of 0.23 m%. |
| 4 | Ni 41.8%, Cr 29.43%,<br>Fe 14.61%, Mo 5.02%,<br>W 2.66%, Co 2.58%,<br>Cu 1.66%, Mn 1.1% | BSC H-8        | This CRM is from Brammer Standard Company, Inc. 14603 Benfer Road, Houston, TX 77069-2807 USA                                                                                                                                                                             |
| 5 | Ti 85.7%, Al 5.87%,<br>Zr 4.05%, Mo 2%,<br>Sn 1.97%                                     | IARM 177A      | This CRM was delivered by ARMI (Analytical Reference Materials International Corporation, 700 Corporate Circle, Suite A, Golden Colorado 80401-5636, USA)                                                                                                                 |
| 6 | Pb 66.8%, Sn 29.5%,<br>Sb 1.8%, Ag 2.1%, Cu 1.4                                         | SUS R Pb 15/54 | This is a recalibration sample from Ulrich Nell, Feldstrasse 23, D - 46149 Oberhausen                                                                                                                                                                                     |

Table S-3. List of elements and their wavelengths used for comparison of plasma radiation intensity in  $\mu$ s-PGD and continuous GD with CCD detection. The data are taken from PLASUS SpecLine 1.32 database.

| Spectral line (nm) | Energy of higher transition level (eV) | Energy of lower transition level (eV) |
|--------------------|----------------------------------------|---------------------------------------|
| Ag I 328.1         | 3.78                                   | 0                                     |
| Ag I 338.3         | 3.66                                   | 0                                     |
| Al II 167.1        | 7.42                                   | 0                                     |
| Al I 394.4         | 3.14                                   | 0                                     |
| Al I 396.2         | 3.14                                   | 0.01                                  |
| B I 249.7          | 4.96                                   | 0                                     |
| B I 249.8          | 4.96                                   | 0                                     |
| Co I 345.4         | 4.02                                   | 0.43                                  |
| Cr II 267.7        | 6.16, 6.18                             | 1.53, 1.55                            |
| Cr I 357.9         | 3.46                                   | 0                                     |
| Cr I 359.3         | 3.45                                   | 0                                     |
| Cr I 360.5         | 3.44                                   | 0                                     |
| Cr I 425.4         | 2.91                                   | 0                                     |
| Cr I 427.5         | 2.9                                    | 0                                     |
| Cr I 520.6         | 3.32                                   | 0.94                                  |
| Cr I 534.6         | 3.32                                   | 1                                     |
| Cu II 224.7        | 8.23                                   | 2.72                                  |
| Cu I 249.2         | 4.97                                   | 0                                     |
| Cu I 261.8         | 6.12                                   | 1.39                                  |
| Cu I 282.4         | 5.78                                   | 1.39                                  |
| Cu I 296.1         | 5.57                                   | 1.39                                  |
| Cu I 324.8         | 3.82                                   | 0                                     |
| Cu I 327.4         | 3.79                                   | 0                                     |
| Cu I 368.7         | 7.18                                   | 3.82                                  |
| Cu I 465.1         | 7.74                                   | 5.07                                  |
| Cu I 510.6         | 3.82                                   | 1.39                                  |
| Cu I 521.8         | 6.19                                   | 3.82                                  |
| Cu I 522.0         | 6.19                                   | 3.82                                  |
| Cu I 578.2         | 3.79                                   | 1.64                                  |
| Fe II 238.2        | 5.2                                    | 0                                     |
| Fe I 372.0         | 3.33                                   | 0                                     |
| Fe I 373.7         | 3.37                                   | 0.05                                  |
| Mn I 403.1         | 3.08                                   | 0                                     |
| Mn I 403.4         | 3.07                                   | 0                                     |
| Mn I 482.4         | 4.89                                   | 2.32                                  |
| Mo I 386.4         | 3.21                                   | 0                                     |
| Nb II 316.3        | 4.29                                   | 0.38                                  |
| Nb II 319.5        | 4.21                                   | 0.33                                  |
| Ni II 216.6        | 6.76                                   | 1.04                                  |
| Ni II 220.7        | 6.87                                   | 1.25                                  |
| Ni II 221.6        | 6.63                                   | 1.04                                  |
| Ni I 341.5         | 3.66                                   | 0.03                                  |
| Ni I 345.8         | 3.8                                    | 0.21                                  |
| Ni I 352.5         | 3.54                                   | 0.03                                  |
| Pb II 167.2        | 9.16                                   | 1.75                                  |
| Pb II 168.2        | 7.37                                   | 0                                     |

|             |       |      |
|-------------|-------|------|
| Pb II 172.7 | 7.18  | 0    |
| Pb II 179.7 | 8.65  | 1.75 |
| Pb II 220.4 | 7.37  | 1.75 |
| Pb I 261.4  | 5.71  | 0.97 |
| Pb I 283.3  | 4.38  | 0    |
| Pb II 438.6 | 11.47 | 8.65 |
| Si I 251.6  | 4.95  | 0.03 |
| Si I 288.2  | 5.08  | 0.78 |
| Sn II 169.9 | 7.3   | 0    |
| Sn II 175.8 | 7.05  | 0    |
| Sn I 284.0  | 4.79  | 0.42 |
| Sn I 286.3  | 4.33  | 0    |
| Sn I 300.9  | 4.33  | 0.21 |
| Sn I 317.5  | 4.33  | 0.43 |
| Sn I 326.2  | 4.87  | 1.07 |
| Sn I 333.1  | 4.79  | 1.07 |
| Sn I 380.1  | 4.33  | 1.07 |
| Ti II 334.2 | 4.28  | 0.57 |
| Ti II 337.3 | 3.69  | 0.01 |
| Ti I 365.4  | 3.44  | 0.05 |
| Ti II 375.9 | 3.9   | 0.61 |
| V II 310.2  | 4.36  | 0.37 |
| V I 411.2   | 3.32  | 0.3  |
| V I 439.0   | 3.1   | 0.28 |
| W I 407.4   | 3.41  | 0.37 |
| Zn I 334.5  | 7.78  | 4.08 |
| Zr I 360.1  | 3.6   | 0.15 |

Table S-4. List of calibration samples used for calibration with Cu lines.

| Matrix                   | Cu concentration (m%) | Sample         |                                                                                                                                                           |
|--------------------------|-----------------------|----------------|-----------------------------------------------------------------------------------------------------------------------------------------------------------|
| Cu 99.9%                 | 99.9                  | IARM 70B       | This CRM was delivered by ARMI (Analytical Reference Materials International Corporation, 700 Corporate Circle, Suite A, Golden Colorado 80401-5636, USA) |
| Cu 98%,<br>Be 1.7%       | 98                    | Self-made      | A self-made reference sample produced in IDW Dresden                                                                                                      |
| Cu 92.5%,<br>Sn 7.5%     | 92.5                  | CuSn8          | Technical bronze, Schreier Metall                                                                                                                         |
| Cu 76%,<br>Ag 24%        | 76                    | Self-made      | A self-made reference sample produced in IDW Dresden                                                                                                      |
| Cu 69.1%,<br>Ni 29.6%    | 69.1                  | IARM 85B       | This CRM was delivered by ARMI (Analytical Reference Materials International Corporation, 700 Corporate Circle, Suite A, Golden Colorado 80401-5636, USA) |
| Cu 60.5%,<br>Zn 32%      | 60.5                  | CRM Brass M233 | Certified Reference Material from ASSO, Mtsensk, USSR                                                                                                     |
| Cu 58.3%,<br>Zn 39.8%    | 58.3                  | IARM 83A       | This CRM was delivered by ARMI (Analytical Reference Materials International Corporation, 700 Corporate Circle, Suite A, Golden Colorado 80401-5636, USA) |
| Cu 58%, Zn 39%,<br>Pb 3% | 58%                   | CuZn39Pb3      | Technical brass, Schreier Metall                                                                                                                          |
